# Supplementary material for: Genome-Wide Association Study to Identify Common Variants Associated with Brachial Circumference: A Meta-Analysis of 14 Cohorts
Source: PLOS journal article supplement (doi:10.1371/journal.pone.0031369), 2012-01-01
Supplement: S3 (10.1371/journal.pone.0031369.s003) [file journal.pone.0031369.s003]

### Forest plot: rs13097456

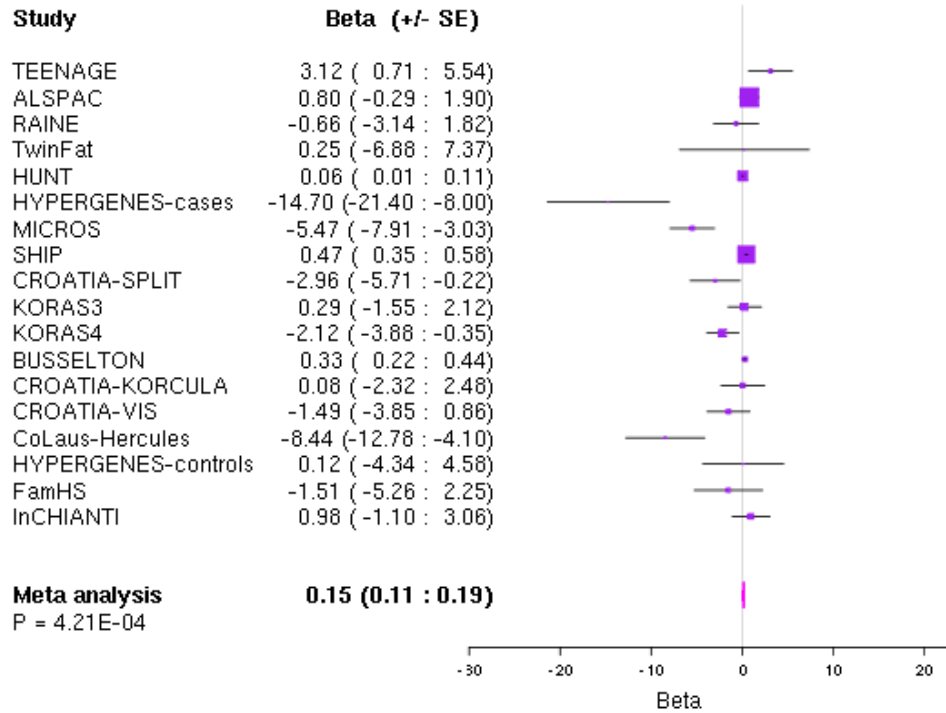

### Forest plot: rs9997081

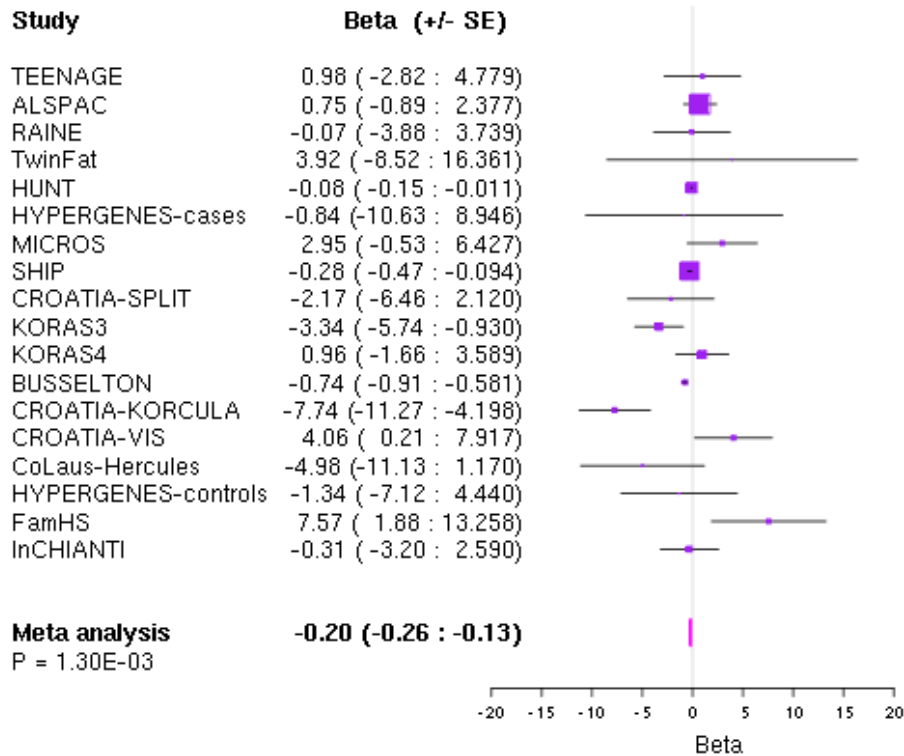

Forest plot: rs17665125

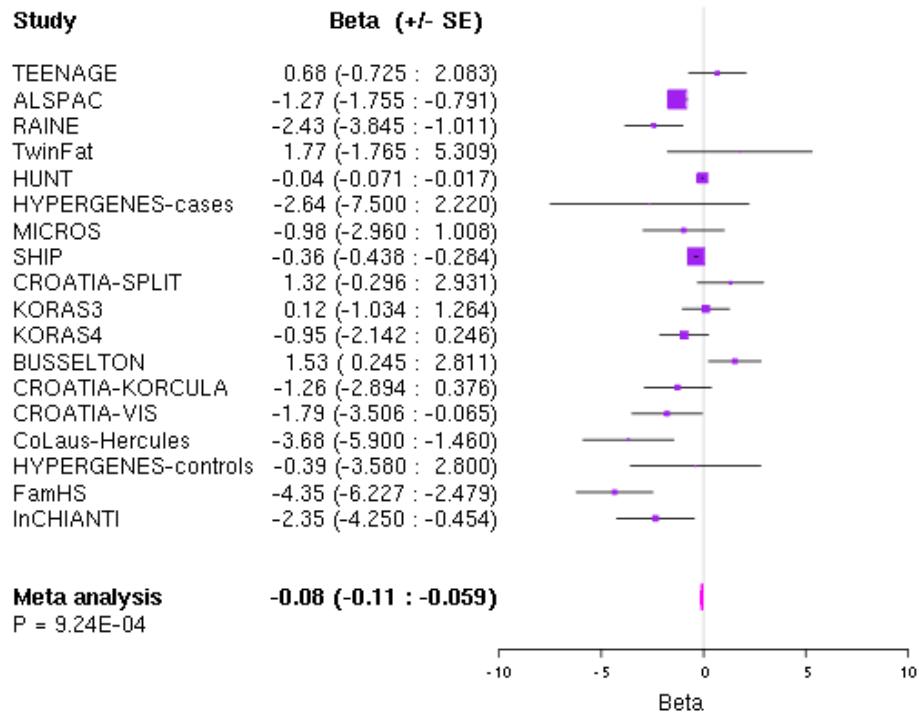

Forest plot: rs11908586

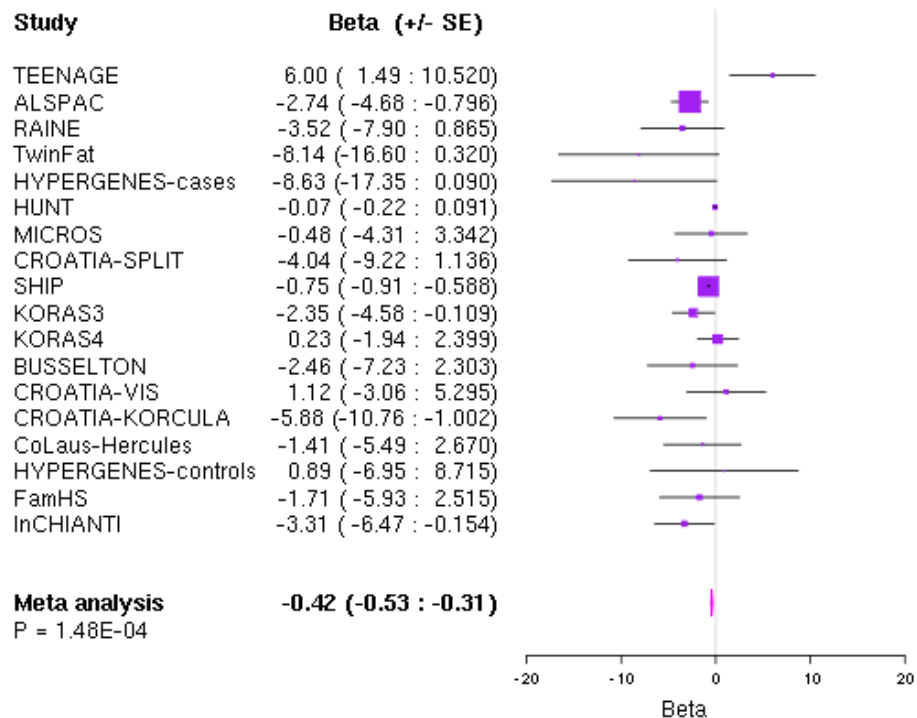

# Forest plot: rs7176881

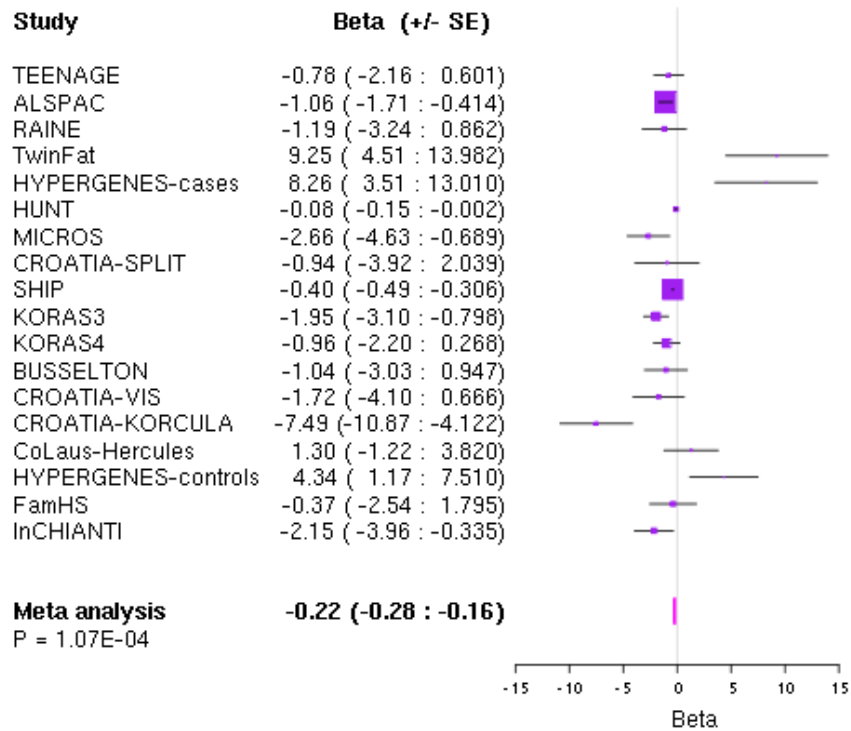

### Forest plot: rs1476587

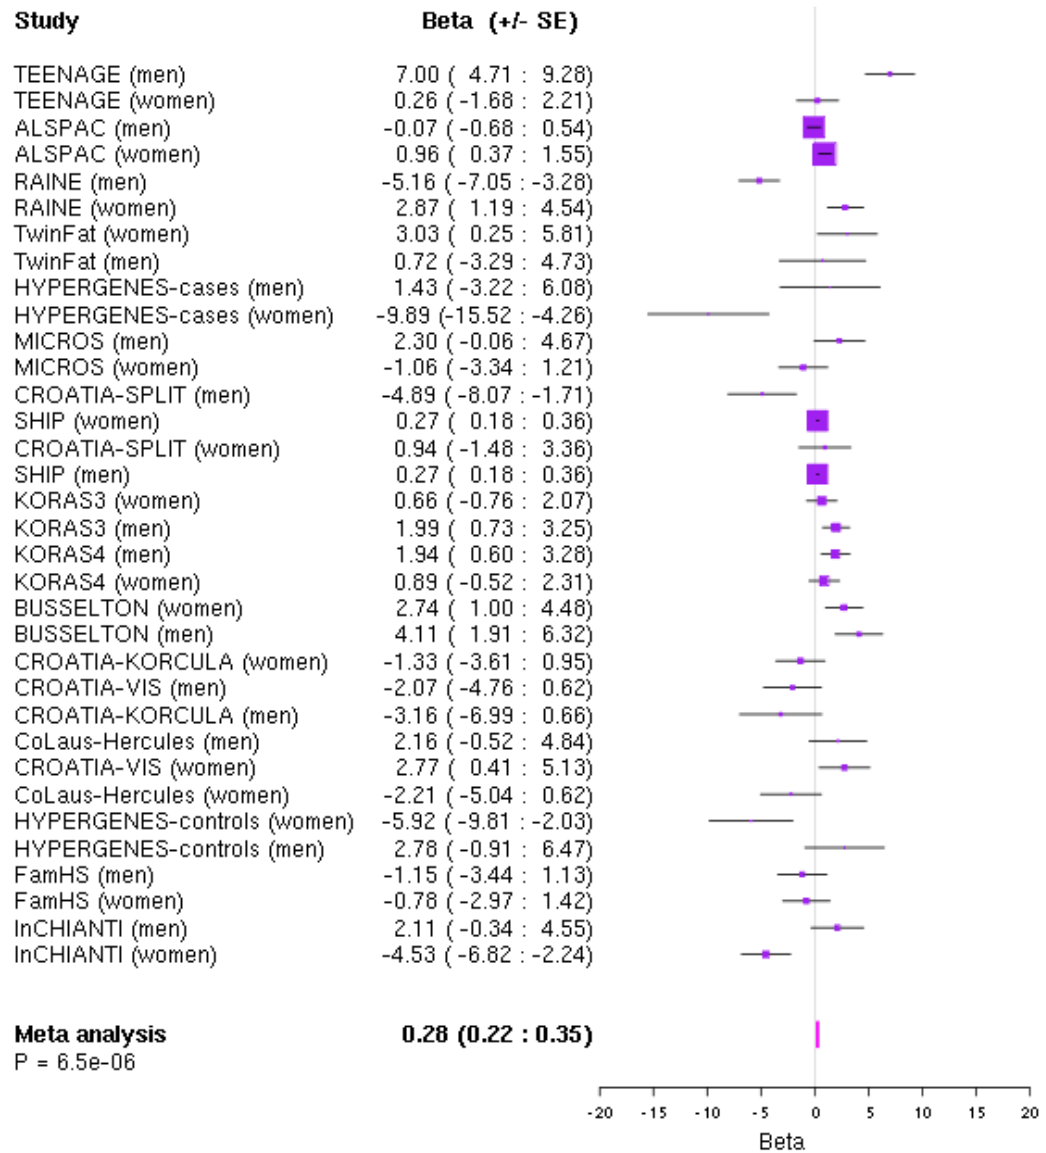

Figure S3. Forest plots for global meta-analysis SNPs with p-value  $\leq 0.001$  with studies ordered by increasing age (the top study contains the youngest individuals). This comparison can indicate the presence of age effects on associations with BC. We have not found clear evidence of age effects on BC.

Box areas are proportional to study sample size.
